# Supplementary material for: Grape seed proanthocyanidin extract protects lymphocytes against histone-induced apoptosis
Source: PeerJ journal article supplement (doi:10.7717/peerj.3108), 2017-03-21
Supplement: 2,_ROS.pdf [file 2,_ROS.pdf]

# Raw data of apoptosis

## Control

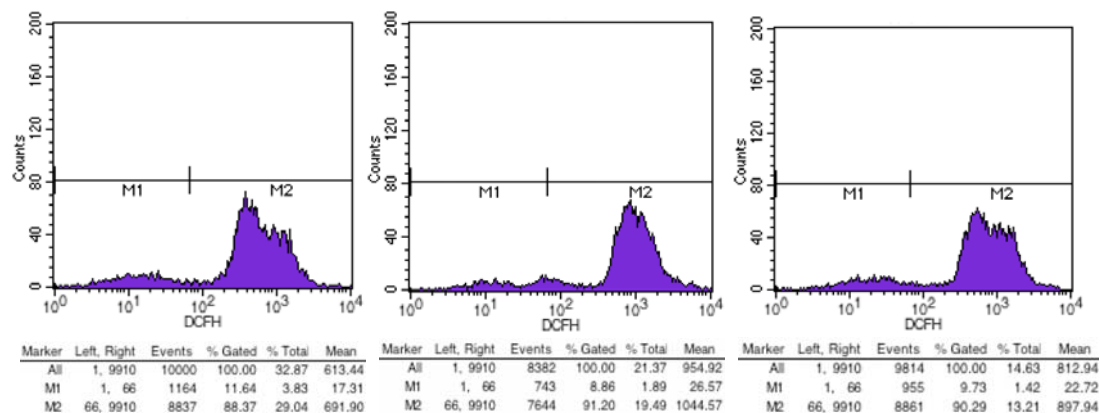

## GSPE

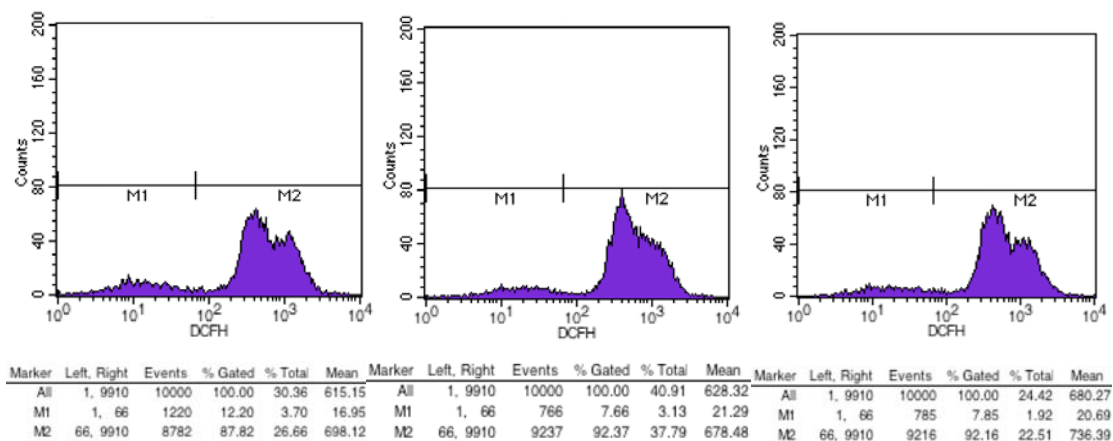

## Histones

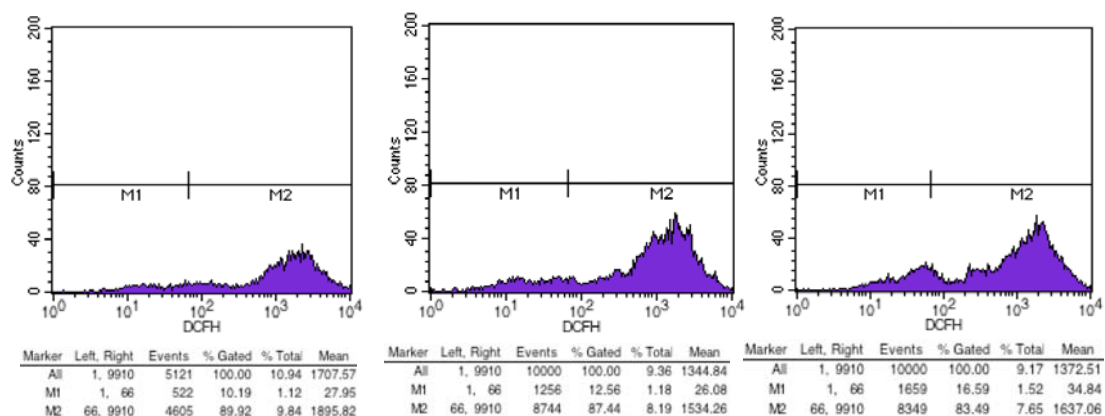

## Histones + GSPE

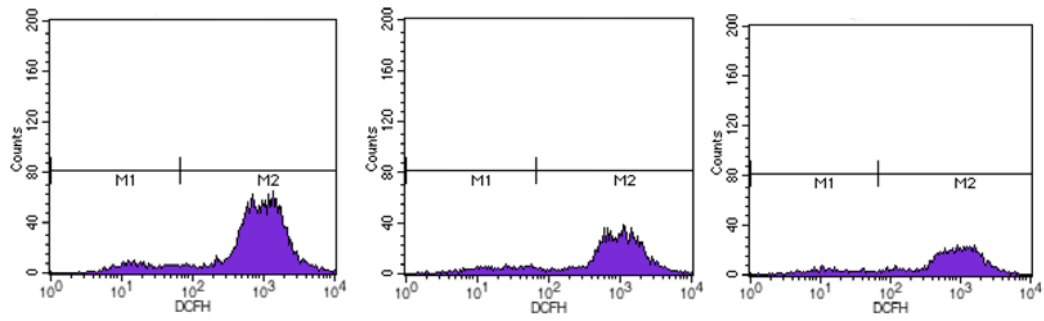

| Marker | Left, Right | Events | % Gated | % Total | Mean    |
|--------|-------------|--------|---------|---------|---------|
| All    | 1, 9910     | 10000  | 100.00  | 13.17   | 989.08  |
| M1     | 1, 66       | 914    | 9.14    | 1.20    | 24.93   |
| M2     | 66, 9910    | 9090   | 90.90   | 11.97   | 1085.62 |

| Marker | Left, Right | Events | % Gated | % Total | Mean    |
|--------|-------------|--------|---------|---------|---------|
| All    | 1, 9910     | 5162   | 100.00  | 10.04   | 1009.61 |
| M1     | 1, 66       | 609    | 11.80   | 1.18    | 24.72   |
| M2     | 66, 9910    | 4556   | 88.26   | 8.86    | 1140.64 |

| Marker | Left, Right | Events | % Gated | % Total | Mean    |
|--------|-------------|--------|---------|---------|---------|
| All    | 1, 9910     | 3643   | 100.00  | 6.64    | 931.33  |
| M1     | 1, 66       | 382    | 10.49   | 0.70    | 19.87   |
| M2     | 66, 9910    | 3263   | 89.57   | 5.94    | 1037.50 |
