# Supplementary material for: Grape seed proanthocyanidin extract protects lymphocytes against histone-induced apoptosis
Source: PubMed Central journal article supplement (PMC5363264; doi:10.7717/peerj.3108), 2017-03-21
Supplement: peerj-05-3108-s001.pdf [file peerj-05-3108-s001.pdf]

# Raw data of apoptosis

## Control

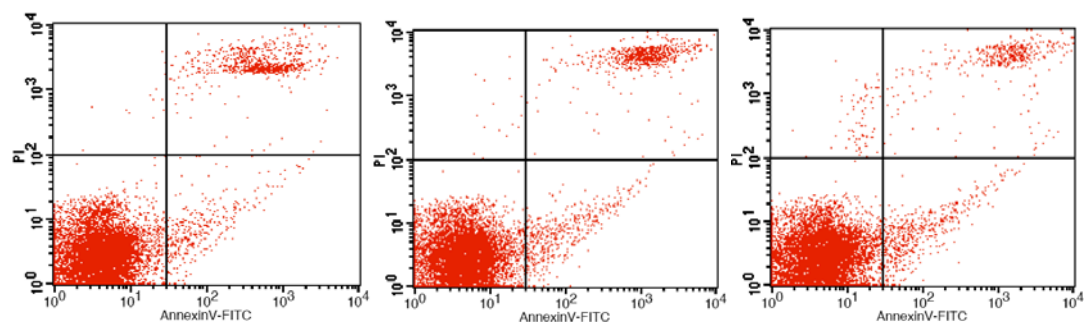

| Quad | Events | % Gated | % Total | Quad | Events | % Gated | % Total | Quad | Events | % Gated | % Total |
|------|--------|---------|---------|------|--------|---------|---------|------|--------|---------|---------|
| UL   | 14     | 0.14    | 0.06    | UL   | 15     | 0.15    | 0.07    | UL   | 78     | 0.78    | 0.34    |
| UR   | 789    | 7.89    | 3.44    | UR   | 737    | 7.37    | 3.26    | UR   | 419    | 4.19    | 1.81    |
| LL   | 8882   | 88.82   | 38.68   | LL   | 8798   | 87.98   | 38.94   | LL   | 9016   | 90.16   | 39.05   |
| LR   | 315    | 3.15    | 1.37    | LR   | 450    | 4.50    | 1.99    | LR   | 487    | 4.87    | 2.11    |

## GSPE

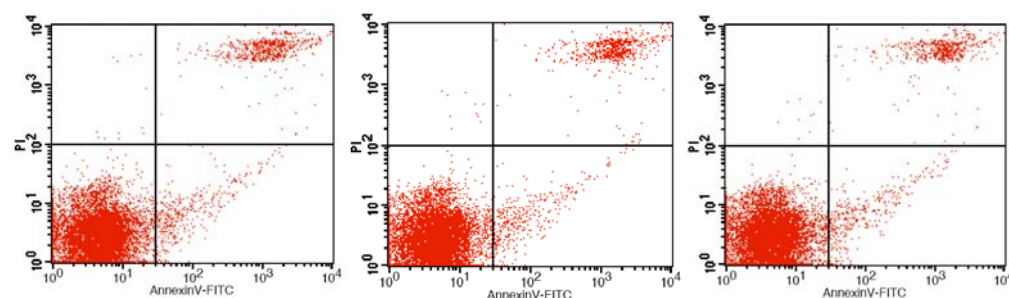

| Quad | Events | % Gated | % Total | Quad | Events | % Gated | % Total | Quad | Events | % Gated | % Total |
|------|--------|---------|---------|------|--------|---------|---------|------|--------|---------|---------|
| UL   | 13     | 0.13    | 0.06    | UL   | 10     | 0.10    | 0.05    | UL   | 11     | 0.11    | 0.05    |
| UR   | 675    | 6.75    | 3.09    | UR   | 687    | 6.87    | 3.32    | UR   | 576    | 5.76    | 2.71    |
| LL   | 8936   | 89.36   | 40.97   | LL   | 8952   | 89.52   | 43.20   | LL   | 9063   | 90.63   | 42.72   |
| LR   | 376    | 3.76    | 1.72    | LR   | 351    | 3.51    | 1.69    | LR   | 350    | 3.50    | 1.65    |

## Histones

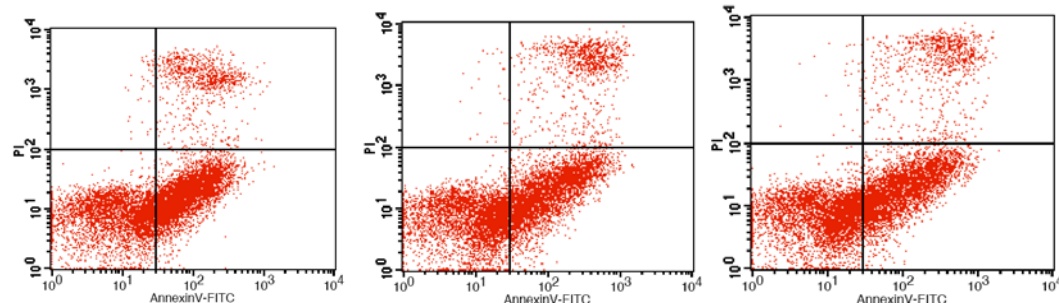

| Quad | Events | % Gated | % Total | Quad | Events | % Gated | % Total | Quad | Events | % Gated | % Total |
|------|--------|---------|---------|------|--------|---------|---------|------|--------|---------|---------|
| UL   | 45     | 0.45    | 0.07    | UL   | 28     | 0.28    | 0.06    | UL   | 32     | 0.32    | 0.07    |
| UR   | 912    | 9.12    | 1.37    | UR   | 1014   | 10.14   | 2.16    | UR   | 821    | 8.21    | 1.76    |
| LL   | 3964   | 39.64   | 5.94    | LL   | 4447   | 44.47   | 9.48    | LL   | 4725   | 47.25   | 10.12   |
| LR   | 5079   | 50.79   | 7.62    | LR   | 4511   | 45.11   | 9.62    | LR   | 4422   | 44.22   | 9.47    |

### Histones + GSPE

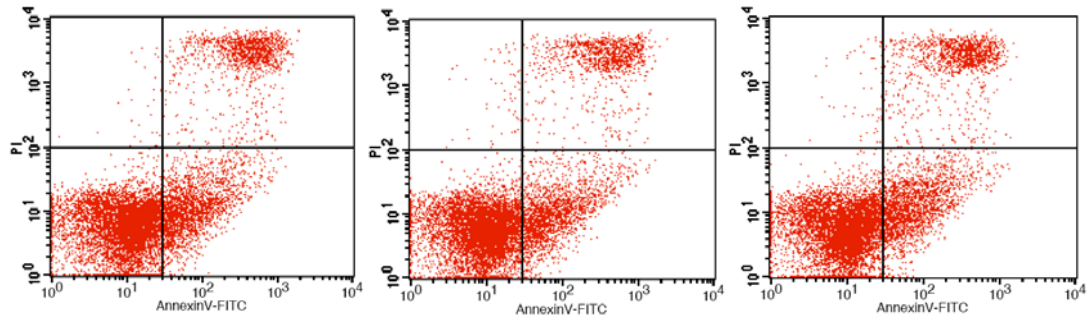

| Quad | Events | % Gated | % Total | Quad | Events | % Gated | % Total | Quad | Events | % Gated | % Total |
|------|--------|---------|---------|------|--------|---------|---------|------|--------|---------|---------|
| UL   | 33     | 0.33    | 0.08    | UL   | 59     | 0.59    | 0.16    | UL   | 56     | 0.56    | 0.12    |
| UR   | 1358   | 13.58   | 3.16    | UR   | 1129   | 11.29   | 2.99    | UR   | 1306   | 13.06   | 2.84    |
| LL   | 6376   | 63.76   | 14.85   | LL   | 6765   | 67.65   | 17.89   | LL   | 6466   | 64.66   | 14.05   |
| LR   | 2233   | 22.33   | 5.20    | LR   | 2047   | 20.47   | 5.41    | LR   | 2172   | 21.72   | 4.72    |

### Histones + NAC

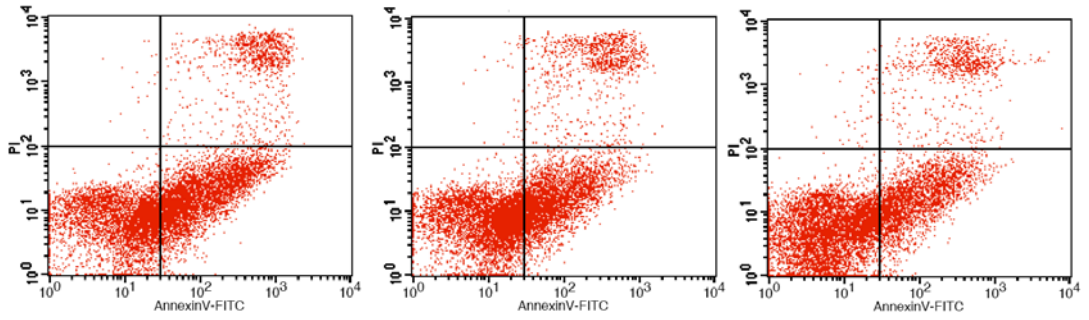

| Quad | Events | % Gated | % Total | Quad | Events | % Gated | % Total | Quad | Events | % Gated | % Total |
|------|--------|---------|---------|------|--------|---------|---------|------|--------|---------|---------|
| UL   | 21     | 0.21    | 0.04    | UL   | 32     | 0.32    | 0.07    | UL   | 54     | 0.54    | 0.14    |
| UR   | 903    | 9.03    | 1.92    | UR   | 970    | 9.70    | 2.22    | UR   | 832    | 8.32    | 2.14    |
| LL   | 4529   | 45.29   | 9.62    | LL   | 5433   | 54.33   | 12.43   | LL   | 6236   | 62.36   | 16.03   |
| LR   | 4547   | 45.47   | 9.65    | LR   | 3565   | 35.65   | 8.16    | LR   | 2878   | 28.78   | 7.40    |
