# Supplementary material for: Grape seed proanthocyanidin extract protects lymphocytes against histone-induced apoptosis
Source: PubMed Central journal article supplement (PMC5363264; doi:10.7717/peerj.3108), 2017-03-21
Supplement: peerj-05-3108-s003.pdf [file peerj-05-3108-s003.pdf]

# Raw data of apoptosis

## Control

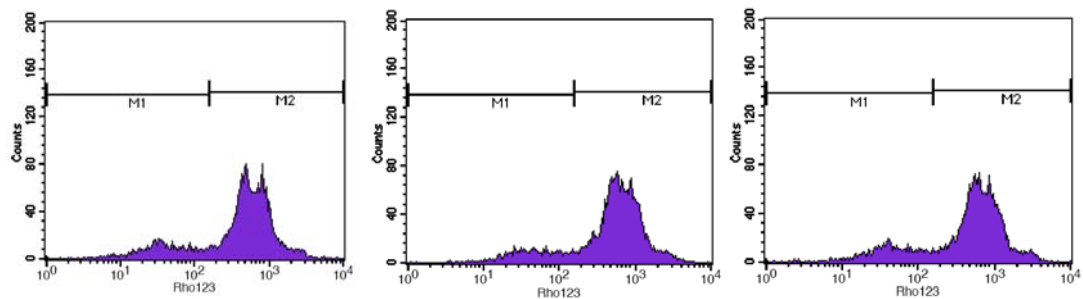

| Marker | Left, Right | Events | % Gated | % Total |
|--------|-------------|--------|---------|---------|
| All    | 1, 9910     | 10000  | 100.00  | 62.29   |
| M1     | 1, 155      | 1779   | 17.79   | 11.08   |
| M2     | 155, 9910   | 8228   | 82.28   | 51.25   |

| Marker | Left, Right | Events | % Gated | % Total |
|--------|-------------|--------|---------|---------|
| All    | 1, 9910     | 10000  | 100.00  | 66.19   |
| M1     | 1, 155      | 1447   | 14.47   | 9.58    |
| M2     | 155, 9910   | 8560   | 85.60   | 56.65   |

| Marker | Left, Right | Events | % Gated | % Total |
|--------|-------------|--------|---------|---------|
| All    | 1, 9910     | 10000  | 100.00  | 59.60   |
| M1     | 1, 155      | 1781   | 17.81   | 10.62   |
| M2     | 155, 9910   | 8224   | 82.24   | 49.02   |

## GSPE

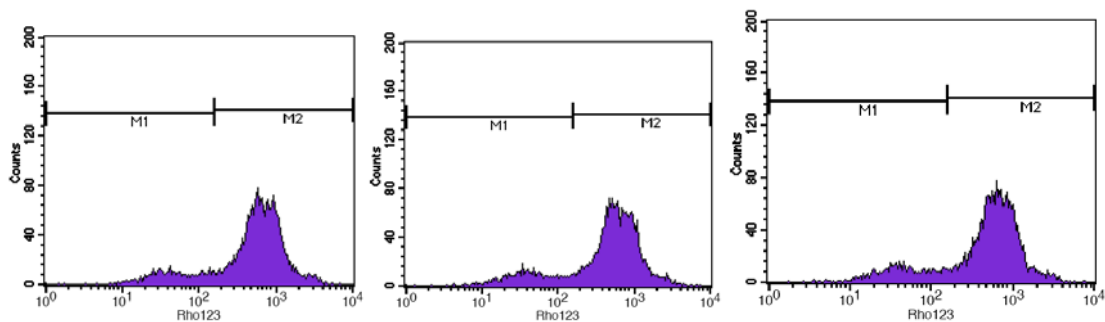

| Marker | Left, Right | Events | % Gated | % Total |
|--------|-------------|--------|---------|---------|
| All    | 1, 9910     | 10000  | 100.00  | 64.38   |
| M1     | 1, 155      | 1463   | 14.63   | 9.42    |
| M2     | 155, 9910   | 8542   | 85.42   | 54.99   |

| Marker | Left, Right | Events | % Gated | % Total |
|--------|-------------|--------|---------|---------|
| All    | 1, 9910     | 10000  | 100.00  | 63.17   |
| M1     | 1, 155      | 1577   | 15.77   | 9.96    |
| M2     | 155, 9910   | 8432   | 84.32   | 53.27   |

| Marker | Left, Right | Events | % Gated | % Total |
|--------|-------------|--------|---------|---------|
| All    | 1, 9910     | 10000  | 100.00  | 59.59   |
| M1     | 1, 155      | 1627   | 16.27   | 9.69    |
| M2     | 155, 9910   | 8382   | 83.82   | 49.95   |

## Histones

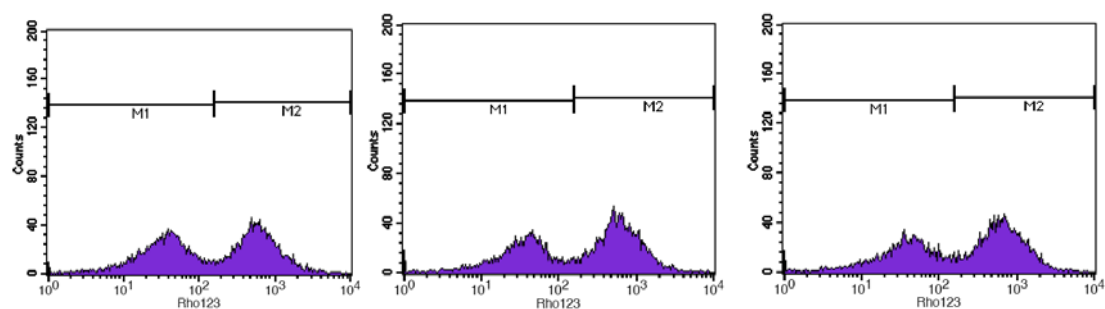

| Marker | Left, Right | Events | % Gated | % Total |
|--------|-------------|--------|---------|---------|
| All    | 1, 9910     | 10000  | 100.00  | 20.68   |
| M1     | 1, 155      | 4927   | 49.27   | 10.19   |
| M2     | 155, 9910   | 5079   | 50.79   | 10.50   |

| Marker | Left, Right | Events | % Gated | % Total |
|--------|-------------|--------|---------|---------|
| All    | 1, 9910     | 10000  | 100.00  | 30.08   |
| M1     | 1, 155      | 4177   | 41.77   | 12.56   |
| M2     | 155, 9910   | 5830   | 58.30   | 17.53   |

| Marker | Left, Right | Events | % Gated | % Total |
|--------|-------------|--------|---------|---------|
| All    | 1, 9910     | 10000  | 100.00  | 30.48   |
| M1     | 1, 155      | 4216   | 42.16   | 12.85   |
| M2     | 155, 9910   | 5790   | 57.90   | 17.65   |

## Histones + GSPE

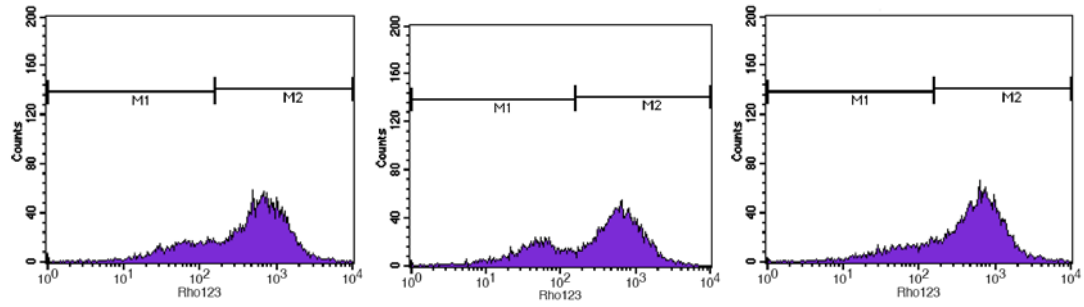

| Marker | Left, Right | Events | % Gated | % Total |
|--------|-------------|--------|---------|---------|
| All    | 1, 9910     | 10000  | 100.00  | 27.74   |
| M1     | 1, 155      | 2360   | 23.60   | 6.55    |
| M2     | 155, 9910   | 7655   | 76.55   | 21.23   |

| Marker | Left, Right | Events | % Gated | % Total |
|--------|-------------|--------|---------|---------|
| All    | 1, 9910     | 10000  | 100.00  | 30.28   |
| M1     | 1, 155      | 2932   | 29.32   | 8.88    |
| M2     | 155, 9910   | 7074   | 70.74   | 21.42   |

| Marker | Left, Right | Events | % Gated | % Total |
|--------|-------------|--------|---------|---------|
| All    | 1, 9910     | 10000  | 100.00  | 27.93   |
| M1     | 1, 155      | 1991   | 19.91   | 5.56    |
| M2     | 155, 9910   | 8025   | 80.25   | 22.41   |

## Histones + NAC

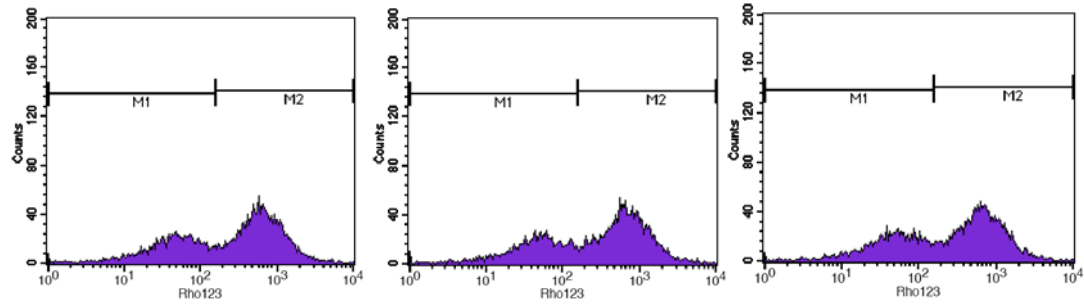

| Marker | Left, Right | Events | % Gated | % Total |
|--------|-------------|--------|---------|---------|
| All    | 1, 9910     | 10000  | 100.00  | 30.28   |
| M1     | 1, 155      | 3689   | 36.89   | 11.17   |
| M2     | 155, 9910   | 6321   | 63.21   | 19.14   |

| Marker | Left, Right | Events | % Gated | % Total |
|--------|-------------|--------|---------|---------|
| All    | 1, 9910     | 10000  | 100.00  | 32.13   |
| M1     | 1, 155      | 3539   | 35.39   | 11.37   |
| M2     | 155, 9910   | 6471   | 64.71   | 20.79   |

| Marker | Left, Right | Events | % Gated | % Total |
|--------|-------------|--------|---------|---------|
| All    | 1, 9910     | 10000  | 100.00  | 32.08   |
| M1     | 1, 155      | 3736   | 37.36   | 11.98   |
| M2     | 155, 9910   | 6275   | 62.75   | 20.13   |
