# Supplementary material for: Grape seed proanthocyanidin extract protects lymphocytes against histone-induced apoptosis
Source: PubMed Central journal article supplement (PMC5363264; doi:10.7717/peerj.3108), 2017-03-21

**Bcl-2: Control, Histones, GSPE, Histones + GSPE**

**GAPDH**

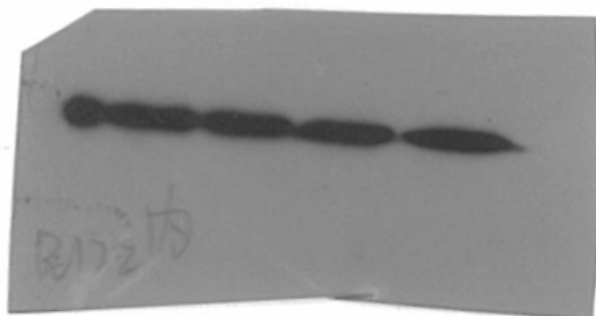

**Bcl-2**

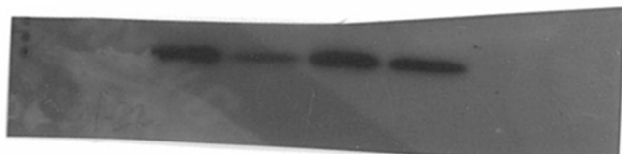

**GAPDH**

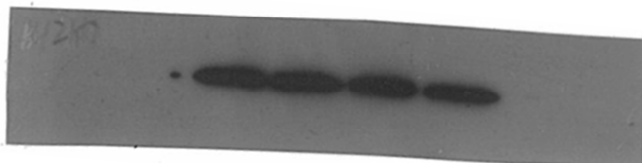

**Bcl-2**

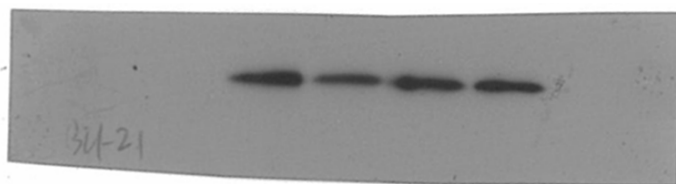

**Bcl-2: Control, GSPE, Histones, Histones + GSPE**

**GAPDH**

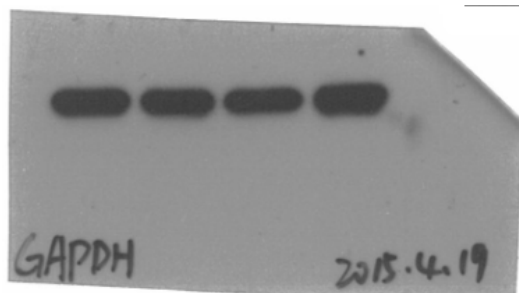

**Bcl-2**

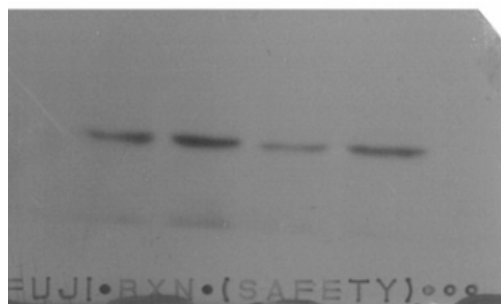

Supplement: peerj-05-3108-s004.pdf [file peerj-05-3108-s004.pdf]
